# Supplementary material for: Aging is associated with an expansion of CD49fhi mammary stem cells that show a decline in function and increased transformation potential
Source: Aging (Albany NY). 2016 Nov 15;8(11):2754–70. doi: 10.18632/aging.101082 (PMC5191868; doi:10.18632/aging.101082)
Supplement: Supplementary file 2 [file aging-08-2754-s002.xlsx]

## Sheet: Sheet2
Luminal_Up	Luminal_Down	Basal_Up	Basal_Down
Cdh1	Ngfr	Acvr1b	Klf6
Tmprss2	Ccnd2	Cnn1	Arg1
Btn1a1	Drp2	Jag2	Enpp3
Slc5a5	Scpep1	Aplp1	Ntn1
Expi	Zfp385a	Krt23	Nfkbia
Slc13a2	Itga5	Fgfrl1	Scara5
Csn3	Col6a1	Bmp7	Mapk12
Elf3	Ckb	Derl3	Kcnk5
Tbc1d8	Tubb6	Ptprs	Hbegf
Fosb	Cd36	Kif1a	Pik3ap1
Crabp2	Apoe	Matn4	Itih5
Atp6v1b1	Man1a	Slpi	Cd55
Pvrl4	Mmd	Jph2	Wisp2
Tmem86a	Fam162a	Myh11	Cyr61
Gm266	Angptl2	Moxd1	Emp1
Apol7a	Aqp1	Unc5b	Ptgs2
Slc5a1	Pgf	Lrig3	Oas3
Ehf	Nid1	Ddit4	Folr2
Aldh1a3	Bmp7	Nipal4	Scd1
Itga2	Odc1	Igfbp3	Dtx4
Bik	Pgam1	Smtn	Basp1
Erbb3	Scarf2	Klhl29	Sbsn
Cd164	Trpv4	Fam101b	Lgals3
Arg1	Dnajb9	Net1	Cd14
Slc5a8	Sulf1	Id4	Ier5
X99384	Jph2	Cxcl14	Rpl35a-ps3
Tspan13	Myh11	Irx4	Apol9a
Fam84a	P4ha1	Emb	Slfn2
Krt19	Dram1	Ero1l	AW112010
Papln	Pdlim4	Fbxo32	Ly6a
Fos	Igfbp3	Fam118a	Glns-ps1
Slc28a3	Aebp1	Trp63
Ocln	Klhl29	Arc
F2rl1	Itgb3	Snai2
Serinc5	Serpina3n	Cpox
Clu	Fbln5	Mylk
Wnt7b	Ctsl	Robo1
Cldn1	Cxcl14	Crim1
Mfi2	Emb	Lama3
Clic6	Fst	Tmem132a
Faim2	Rnase4	Sorbs1
Krt7	Dpysl2	Il23a
Krt18	Slc7a8	1500015O10Rik
Slc5a7	Adcy4	Ptpn14
Enpp5	Matn2	Sema6d
Dsc2	Has2	Jag1
Tnf	Col14a1	Fabp5
Mal2	Snai2	Pla2g12a
Slc12a2	Sdf2l1	Pappa
Gna14	Mylk	Tpm2
Trpm6	Cbr3	Plch2
Podxl	Pcdhga9	Gpr125
Homer2	Creld2	Tes
2010300C02Rik	Pcbp4	Slc6a6
Ogfrl1	Cyp1b1	Art4
3110079O15Rik	Epas1	Synm
Epb4.1l5	Lims2	Dkk3
Nek7	Dpysl3	Tgfb1i1
Slc45a3	Ppic	Stim1
Trp53bp2	Pcsk5	Rab39b
Atp1b1	Hdgfrp3	Rnf128
Elf5	Shmt2	Sfrp1
Mal	Pdia4	Rbpms
Chmp4c	Sele	Pdlim3
Nbea	Soat1	Cotl1
F3	Mark1	Trim29
Tmem56	Rgs5	Tagln
Clca3	Dhrs9	Rab27a
Bspry	Sema6d	Elovl4
Prkaa2	Fbn1	Car12
Zbtb8a	Jag1	Lama1
Prom1	Cd93	Egln3
Plb1	Postn	Lars2
Rassf6	Vcam1	Krt17
Cxcl15	Prss12	Acta2
Areg	Gem	Pawr
Rhpn2	Hspg2	Enpp1
Mfge8	Hgf	Stox2
Pik3c2a	Abcb1b	Galntl4
Dgat2	Pcdh7	Man2a2
Dkkl1	6330406I15Rik	Nexn
Rab11fip1	Eln	Igfbp2
Ido1	Slc6a6	Dag1
Hp	Mgp	Nxph4
Mmp15	Dkk3	Cyp2s1
Pgr	Tgfb1i1	Fzd7
Barx2	Adm	Rbbp8
Mpzl2	Cdr2	Rasl12
Acsbg1	Magee1	Csdc2
Thsd4	Gabre	Adora1
Pik3cb	Rasa3	Tril
Ltf	Plat	Krt14
Trib1	Sfrp1	Sh3tc2
Mansc1	Adcy7	Rbp1
Inppl1	Cdh5	Kctd4
Tpcn1	Pou2af1	Stbd1
Cdo1	Glce	Lmod1
Myo5c	Chsy1	Pthlh
Fgb	Abcc4	Oxtr
Rhov	Slc16a1	Arl4c
Evpl	Gas7	Gas1
Plcg2	Ptprm	Cntn2
AI661453	Mif	Hunk
Tmem30b	Antxr1	Sh3pxd2a
Pof1b	Ttc7b	Mill1
Ly6d	BC034090	Krt15
Dusp5	Chst11	B4galnt4
Epgn	Scn7a	B4galt6
Ubd	Pygo1	Pard6g
Foxa1	Acta2	Palld
Capn5	Palm	Spock2
9930023K05Rik	Apln	Actg2
Sh3bp4	Spon2	Cdh3
Anln	Serpine1	Krt5
Wnt4	Sobp	Chi3l1
Inhbb	Fau	Ppp1r3c
Tmprss13	Dennd2a	Tmem88b
Shank2	Gdf15	Gm12895
Notch3	Sec24d	Gm12896
Fam108c	Igfbp2	Gm16908
Cdk19	Prss23
Capn8	Dse
Mboat1	Hip1
Ppl	Cacna2d1
Slc44a3	Gpr161
Abcc8	Begain
Plekha6	Ccdc8
Lad1	Mmrn2
Macc1	Fmod
Wfdc12	Prelp
Rasef	Kcnj2
Otud1	Rasl12
Ccdc64b	Kirrel
Aqp5	Vwa1
Pard6b	Hilpda
Sowahb	Zfp354c
Epcam	1190002N15Rik
Niacr1	Cd109
Basp1	Olfml2a
Gjb2	Ppp1r3b
0610010O12Rik	Lhfp
Ttc6	Osr1
Cd24a	Apol10b
Cldn4	Gja1
Fcgbp	Gas1
Foxi1	Lrrc8c
Krt8	Tns1
Dscam	Mtap6
Foxc1	Maf
Cldn8	Gpr116
Muc15	Gnai1
Sgms2	Spock2
Vtcn1	Rps27a-ps2
Tacstd2	Ifitm2
Cd14	Layn
Smagp	AI597468
O3far1	Cxcl12
Kcnn4	Gm6311
Ceacam2	Gm5619
Ano9	Fabp4
Cadm4	Gm10155
Cldn23	Gm8226
1810011O10Rik	Rpl7a-ps11
Krt4	Gm8210
Cxcl17	Gm14648
0610040J01Rik	Lgals1
Plekhh1	Gm10240
Gdpd1	Rpl7a-ps3
Cyp2d22	Gm8910
Slco1a5	Gm12070
Spnb3	Rpl7a-ps10
Cgn	Serpinh1
Mpzl3	Gm10291
Cyp3a57	Gm10293
Cldn3	Gm10359
Cited4	Zfp9
Trim68	Gm10481
Ttpa	Gm10566
Ceacam1	Gm6252
Gm16485	2610203C20Rik
9530053A07Rik	Gm10709
Gm6517	Ism1
	Fibin
	Fjx1
	Rps2-ps6
	Selm
	Gm15887
	Gm7336
	Gm2574
	Gm5559
	Gm2606
	Gm4609
	Gm12537
	Dact3
	Gm12033
	Prnp
	Gm3222
	Gm5138
	Gm12671
	Gm12922
	Gm12933
	Gm14760
	Gm14934
	Gm11687
	Gm8172
	Gm11703
	Gm12892
	Gm13394
	Tpt1-ps6
	Gm16854
	Gm12840
	Gm8113
	0610007N19Rik
	Rps27
	Lrrc32
	Rian
	Gm8841
